1  
2  
3  
4  
5  
6  
7  
8  
9  
10  
11  
12  
13  
14  
15  
16  
17  
18  
19  
20  
21  
22  
23

# Associations between neonatal cry acoustics and visual attention during the first year

Aicha Kivinummi<sup>1</sup>, Gaurav Naithani<sup>2</sup>, Outi Tammela<sup>3,4</sup>, Tuomas Virtanen<sup>2</sup>, Enni Kurkela<sup>1</sup>, Miia Alhainen<sup>4</sup>, Dana J. H. Niehaus<sup>5</sup>, Anusha Lachman<sup>5</sup>, Jukka M. Leppänen<sup>4,6</sup>, and Mikko J. Peltola<sup>1</sup>

<sup>1</sup> Faculty of Social Sciences, Tampere University, Tampere, Finland

<sup>2</sup> Faculty of Information Technology and Communication Sciences, Tampere University, Tampere, Finland

<sup>3</sup> Department of Pediatrics, Tampere University Hospital, Tampere, Finland

<sup>4</sup> Faculty of Medicine and Health Technology, Tampere University, Tampere, Finland

<sup>5</sup> Department of Psychiatry, Faculty of Health Sciences, Stellenbosch University, Cape Town, Republic of South Africa

<sup>6</sup> Faculty of Education and Psychology, University of Jyväskylä, Jyväskylä, Finland

Corresponding author: Mikko Peltola, Human Information Processing Laboratory, Faculty of Social Sciences, Tampere University, 33014 Tampere, Finland. E-mail: [mikko.peltola@tuni.fi](mailto:mikko.peltola@tuni.fi), tel: +358503186120

24

## 25 **Abstract**

26

27

28

29 It has been suggested that early cry parameters are connected to later cognitive abilities. The present  
30 study is the first to investigate whether the acoustic features of infant cry are associated with  
31 cognitive development already during the first year, as measured by oculomotor orienting and  
32 attention disengagement. Cry sounds for acoustic analyses (fundamental frequency; F0) were  
33 recorded in two neonatal cohorts at the age of 0-5 days (Tampere, Finland) or at 6 weeks (Cape  
34 Town, South Africa). Eye tracking was used to measure oculomotor orienting to peripheral visual  
35 stimuli and attention disengagement from central stimuli at 8 months (Tampere) or at 6 months  
36 (Cape Town) of age. In the Tampere cohort, a marginal positive correlation between fundamental  
37 frequency of cry (F0) and visual attention disengagement was observed; infants with a higher  
38 neonatal F0 were slower to shift gaze away from the central stimulus to the peripheral stimulus.  
39 However, a similar correlation was not observed in the Cape Town cohort. No associations between  
40 F0 and oculomotor orienting were observed in either cohort. We discuss possible factors  
41 influencing the discrepancy in results between the cohorts and suggest directions for future research  
42 investigating the potential of early cry analysis in predicting later cognitive development.

43

44

45

46

47

## 48 **Introduction**

49  
50 Monitoring children's cognitive development is an important part of pediatric practice. Traditional  
51 psychometric methods enable detailed and reliable measurements especially after two years of age.  
52 However, the assessment of cognitive development during the neonatal period and early infancy is  
53 faced with multiple challenges, such as age-related changes in how different cognitive functions can  
54 be measured. For example, motor abilities are emphasized in most early measures, but their relation  
55 to cognitive functioning may vary at different ages, which may weaken the predictive validity of  
56 early assessments of cognitive development (Colombo, 1993; McCall, 1979). These challenges  
57 make research on the early markers of later cognitive functioning important.

58         The current study is focused on the connection between the acoustic characteristics of  
59 infant cry and visual attention within the first year of life. Cry is a vital, reflex-like means of  
60 communication present from the very beginning of life (Newman, 2007) and it indicates the  
61 neurological status of the neonate (LaGasse et al., 2005; Lester, 1987) . Variations in visual  
62 attention during the first year have been shown to be associated with later cognitive development  
63 (Colombo, 2002; Dougherty & Haith, 1997; Rose et al., 2003; Rose et al., 2012), thus providing an  
64 outcome measure that emerges early in development and is meaningfully associated with more  
65 complex and later-emerging cognitive functions. As both the acoustic characteristics of cry and  
66 visual attention can be measured reliably at an early age, examining their interrelations may help to  
67 determine the potential of neonatal cry analysis as an accessible, complementary marker of later  
68 development.

69         A limited number of small-scale studies are available to suggest that early cry parameters  
70 are associated with later cognitive abilities. Lester (1987) observed that preterm and term infants  
71 having high average fundamental frequency of cry (F0; heard as the pitch of the cry) and larger  
72 variability in F0 within 2 weeks of term postconceptional age were more likely located in the group  
73 with lower scores on the Bayley Scales of Infant Development at 18 months of age compared to

74 infants with lower average F0 and less variable F0. In addition, high variation in neonatal F0  
75 predicted lower scores in the McCarthy Scales of Children's Abilities at 5 years of age. Similarly,  
76 studying infants prenatally exposed to methadone, Huntington et al. (1990) found that higher and  
77 more variable F0 in the first days of life were related to lower mental development scores measured  
78 by the Bayley scales at 8, 12, and 18 months. However, the association was only marginal at 24  
79 months. Both Lester (1987) and Huntington et al. (1990) observed that the relation between the F0  
80 variables and the cognitive development outcomes remained after controlling for risk factors  
81 including prematurity and prenatal exposure to drugs. Other studies have observed that the acoustic  
82 characteristics of cry in children with neurodevelopmental disorders such as CNS abnormalities and  
83 developmental delays (for reviews, see (LaGasse et al., 2005; Michelsson & Michelsson, 1999) and  
84 children with autism spectrum disorders (Esposito et al., 2014; Sheinkopf et al., 2012) are  
85 associated with an atypical and more unstable F0. The similarities in the findings of studies  
86 investigating at-risk infants, as well as the scarce findings among normally developing infants  
87 emphasize the importance of further research on the connections between the acoustic features of  
88 newborn cry and cognitive functioning during the first year of life among typically developing  
89 infants.

90       Regarding the neural basis of variation in neonatal cry, it is suggested that imperfect  
91 functioning of the vagus nerve and inhibitory parasympathetic nervous system activity are reflected  
92 in infant cry as higher and more variable F0 (Porter et al., 1988; Lester et al., 1976). Neonatal cry  
93 requires versatile integration of respiratory and larynx area organs, which are suggested to be  
94 controlled in early, reflex-like crying exclusively by the brainstem. No higher areas than the  
95 midbrain are required for producing cry during the first months of life (Newman, 2007).  
96 Consequently, the integrity of the brainstem is suggested to influence the acoustic features of cry  
97 (Lester, 1987; Vohr et al., 1989) and the vagus nerve of the parasympathetic nervous system is  
98 considered as a crucial pathway through which the brainstem regulates neonatal and infant cry

99 (Newman, 2007; LaGasse et al., 2005; Lester et al., 1989). The vagus nerve originates from the  
100 medulla oblongata in the brainstem and is densely connected with the vocal cords and respiratory  
101 muscles, on which it has an inhibitory function. In addition, neonatal F0 has been shown to vary as  
102 a function of cardiac vagal tone (Shinya et al., 2016). Thus, imperfect inhibitory parasympathetic  
103 control of the cry organs is likely reflected in higher and more variable infant F0. These findings  
104 highlight the role of the brainstem and vagal system in affecting neonatal cry acoustics.

105 In addition to influencing infant cry production, integrity of the brainstem may have a  
106 pivotal impact on visual attention and the processing of visual information (Colombo, 2001; Geva  
107 & Feldman, 2008; Geva et al., 2014; Hunnius & Geuze, 2004). The physiologically based model of  
108 attention suggests that vagus nerve mediated organizational processes of the brainstem are required  
109 to integrate sensory and motor information on attention. As a part of the parasympathetic nervous  
110 system, the vagus nerve has an inhibitory function on arousal. Further on, attention is typically  
111 modulated by arousal state and it has been observed that infants with brainstem dysfunction show  
112 atypical modulation of attention by arousal. Healthy neonates preferred familiar visual stimuli  
113 during increased arousal and novel stimuli during decreased arousal, whereas this pattern was less  
114 pronounced in neonates with brainstem dysfunction (Gardner et al., 2003). Karmel et al. (1996)  
115 observed that a similar atypical arousal-modulated attention pattern persists at least until 4 months  
116 of age in infants with brainstem dysfunction. In addition, sensitivity to social and non-social content  
117 of visual stimuli is connected to brainstem integrity. Geva et al. (2017) detected that children with  
118 discrete neonatal brainstem dysfunction preferred an active nonsocial content (a flock of birds  
119 flying) or a neutral social content (a person listening) over an active social content (a person  
120 expressing affective narratives). These findings were opposite to the pattern of attention in normal  
121 controls and the difference remained even in a follow up at 8 years of age.

122 Thus, it appears that neonatal cry and infant visual attention share partially overlapping

123 neural mechanisms, with particularly the brainstem implicated in both. In the current study, we  
124 therefore investigated the associations between infant cry acoustics (F0 and its variation) during the  
125 neonatal period (0-6 weeks) and visual attention at 6-8 months of age. As the indicator of infant  
126 visual attention, we measured oculomotor orienting and attention disengagement, both  
127 operationalized as saccadic reaction times in separate eye tracking paradigms.

128         The ability to produce rapid shifts of gaze to stimuli appearing in a new spatial location,  
129 typically measured as saccadic reaction time, matures in early infancy and its variations correlate  
130 with later cognitive development (Dougherty & Haith, 1997). For example, infants with longer  
131 latency of saccades to peripheral target stimuli were shown to score lower on standardized IQ  
132 measures at 4 years of age (Dougherty & Haith, 1997). In addition, saccadic reaction times have  
133 been shown to be affected by neurodevelopmental risk factors such as prenatal alcohol exposure  
134 (Green et al., 2013), preterm birth (Hunnius et al., 2008) and familial risk for autism spectrum  
135 disorder (Elsabbagh et al., 2013). Hence, studying infant visual attention with paradigms measuring  
136 saccadic reaction times may provide objective and applicable markers for examining neurocognitive  
137 development in a variety of populations.

138         We used two infant attention paradigms for measuring saccadic reaction times. First,  
139 oculomotor orienting was measured as saccadic reaction time to a new peripheral stimulus  
140 following the offset of a stimulus on the center of the screen. Second, we measured disengagement  
141 of attention as the duration of gaze shift from centrally presented face and non-face stimuli to  
142 laterally presented competing stimuli. Particularly oculomotor orienting has been associated with  
143 later cognitive development, with faster saccadic reaction times in infancy predicting higher  
144 childhood IQ (Dougherty & Haith, 1997; Rose et al., 2012). Attention disengagement paradigms  
145 have been especially used for investigating infants' attention to social stimuli such as faces (Peltola  
146 et al., 2008) with recent findings indicating that variations in infants' attention to faces in this  
147 paradigm are associated with later social development (Peltola et al., 2018). Furthermore, given that

148 oculomotor orienting and attention disengagement appear to mature at different speed during the  
149 first year (with attention disengagement maturing later) (Colombo, 2001; Hood & Atkinson, 1993;  
150 Matsuzawa & Shimojo, 1997) and rely on different neural mechanisms (Colombo, 2001; Rafal &  
151 Robertson, 1995) we considered it important to include both measures of infant attention in the  
152 current study.

153 Taken together, as infant cry and visual attention may have a partially overlapping neural  
154 basis and as the basic functions of infant visual attention may be important in understanding later-  
155 emerging more complex cognitive and social abilities, infant visual attention is an ideal outcome  
156 measure for attempts to determine whether the acoustic features of newborn cry are associated with  
157 normative developmental variations in basic cognitive functions.

158 Due to the rather explorative nature of our study, we implemented the analysis across two  
159 independent samples of infants from Tampere, Finland and Cape Town, South Africa, to assess the  
160 replicability of the findings. Based on previous findings showing that both F0 of infant cry  
161 (Huntington et al., 1990; Lester, 1987) and saccadic reaction times (Dougherty & Haith, 1997; Rose  
162 et al., 2012) are associated with childhood cognitive development, we studied whether higher and  
163 more variable F0 would be associated with longer saccadic reaction times in the oculomotor  
164 orienting task. Regarding the attention disengagement paradigm, the paucity of previous research  
165 prevented testing strong directional hypotheses. However, given the links between neonatal cry  
166 production and brainstem integrity on the one hand (Newman, 2007; Vohr et al., 1989) and between  
167 brainstem integrity and attention to social stimuli on the other hand (Geva et al., 2017), it could be  
168 tentatively hypothesized that higher and more variable F0 would be associated with less attention to  
169 faces in the attention disengagement paradigm (i.e., faster saccadic reaction times in shifting  
170 attention away from faces).

## 171 **Materials and Methods**

172

### 173 **Ethics Statement**

174

175           The study adhered to ethical guidelines and the study protocol was approved by the Ethical  
176 Committee of Tampere University Hospital and, on behalf of Cape Town participants, by the  
177 Institutional Review Board of Stellenbosch University. Infants were included in the study after a  
178 written consent from their parent was obtained.

### 179 **Participants**

180

181           Data for the current analyses were obtained from two cohorts, one in Tampere, Finland, and  
182 the other in Cape Town, South Africa. Our interest was to study the associations between acoustic  
183 variables of cry during the neonatal period (Tampere: 0-5 days after birth; Cape Town: 6 weeks of  
184 age) and infant visual attention measured by eye tracking methods (Tampere: 8 months; Cape  
185 Town: 6 months of age).

#### 186 **Tampere cohort**

187           Participants in the Tampere cohort were enrolled in the study at birth (0-5 days) and  
188 subsequently invited for a follow-up visit at 8 months of age (mean = 253.58 days,  $SD = 12.34$   
189 days). A total of 104 neonates were recruited from the Tampere University Hospital Maternity  
190 Ward Units and the Neonatal Ward Unit. Infants were considered eligible to be enrolled in the study  
191 if the infant did not have any kind of abnormalities in the neck area, nor a history of recent airway  
192 suctioning, which may influence the voice, and if one of the parents understood Finnish or English  
193 sufficiently to be able to be adequately informed about the study.

194           From the original pool of 104 infants, 6 infants did not cry when the researcher was present,  
195 hence cry recording was captured from 98 infants. Out of these, 73 infants attended the eye tracking  
196 follow-up visit at 8 months. Eye tracking data were not obtained from 5 infants because of technical



197 problems and from 4 infants because the infant showed inconvenience about the registration  
198 situation. Two infants were further excluded because of not being full-term ( $\geq 37$  weeks), 3 because  
199 of low birth weight ( $\geq 2500$  grams), 2 because of perinatal asphyxia, and 1 because of an abnormal  
200 brain MRI finding.

201 From this sample of 56 infants, 2 infants needed to be excluded because of the inclusion  
202 criteria of the cry analysis. At least 3 expiratory cry utterances from the beginning of the recording  
203 had to be present for analyzing the F0. For the analyses of oculomotor orienting, 2 infants were  
204 excluded for having less than 4 trials with good gaze data for calculating oculomotor orienting. For  
205 the analyses of attention disengagement, 8 infants were excluded for having less than 3 scorable  
206 trials in one of the stimulus conditions (i.e., a non-face control stimulus and happy and fearful face  
207 stimuli).

208 Consequently, 52 infants (22 female, 30 male) and 46 infants (female 19, male 27) were  
209 included in the oculomotor orienting and attention disengagement analyses, respectively. The  
210 included infants did not have known health or developmental disadvantages nor known prenatal  
211 mother-related risk factors, such as drug abuse, untreated diabetes or high blood pressure. Data  
212 about health, risk factors, and medical therapies were collected from the medical records of the  
213 hospital.

214 In addition to the primary analyses, we ran additional analyses including only those infants  
215 whose cry was captured from the beginning of a cry bout. This was done to enable more direct  
216 comparisons with the Cape Town cohort in which the cry recordings were always captured from the  
217 beginning of the cry bout. Thus, this analysis controlled the possible influence of the location of the  
218 cry sample in the recording. For these analyses, 29 and 28 infants were included in the oculomotor  
219 orienting and attention disengagement analyses, respectively.

220 **Cape Town cohort**

221 The data for the Cape Town cohort was obtained from a larger research project in  
222 collaboration with the Department of Psychiatry at the Stellenbosch University. Participants were  
223 enrolled in this study at the age of 6 weeks (mean = 44.73 days,  $SD = 3.34$  days) and they  
224 participated in the follow-up registration at 6 months (mean = 187.85 days,  $SD = 13.84$  days) of  
225 age. Similarly to the Tampere cohort, the infants did not have any kind of abnormalities in the neck  
226 area, nor a history of recent airway suctioning, which may influence the voice. Likewise, the other  
227 exclusion criteria were concordant with the Tampere cohort.

228 Cry recordings were obtained from a total of 100 infants. The follow-up assessment was  
229 completed by 73 infants. Of these, 5 infants needed to be excluded because of the age criteria at cry  
230 recording and 4 because there were less than 3 expiratory cry utterances in the recording. Three  
231 infants were excluded for not being full-term ( $\geq 37$  weeks). Birthweight data was not available for  
232 this cohort, and none of the infants had perinatal asphyxia or a brain MRI finding. The infants did  
233 not have other health or developmental disadvantages. Considering the inclusion criteria of mother-  
234 related risk factors, we excluded 6 infants due to prenatal alcohol use. For the eye tracking data,  
235 identical inclusion criteria were used as in the Tampere cohort. Consequently, 47 infants (18  
236 female, 29 male) and 53 infants (19 female, 34 male) were included in the oculomotor orienting and  
237 disengagement analyses, respectively.

238 Within the cohort in the primary analysis, there were 14 infants exposed to prenatal SSRI  
239 medication. Therefore, to control the possible influence of SSRI medication, additional analysis  
240 were conducted after excluding these participants, resulting in 37 and 42 infants in the oculomotor  
241 orienting and attention disengagement analyses, respectively. In both the analyses a proportion of  
242 mothers had psychiatric problems such as depression and anxiety disorders. This was due to the  
243 interests in the larger research project, from where the data was captured.

244

## 245 **Measurements**

246

## 247 **Cry recordings in Tampere**

248 We recorded one cry sample from each infant in normal clinical settings at the age of 0 to 5  
249 days. During the recording, infants were laying on supine position. The location of the captured  
250 sample in the cry bout varied since we recorded spontaneous cries which were not launched by a  
251 distinct painful trigger. Soothing was performed by the parent whenever needed.

252 The duration of the samples in the whole data ranged from 14.4 s to 430.5 s (mean =114.2 s;  
253  $SD = 81.7$ ) The recording microphone was a Tascam DR-100MK Linear PCM Recorder, Røde M3  
254 cardioid microphone. The samples were stored with a 48-kHz sampling rate, in a 24-bit Waveform  
255 Audio file (WAV) format. The microphone was at a stand at 30-cm distance directly in front of the  
256 infant's mouth.

## 257 **Cry recordings in Cape Town**

258 Recording of the cry was done as a part of a standardized protocol at a routine 6-week baby  
259 clinic visit to the nurse. The room was always the same and the cry was elicited by vaccination or  
260 measuring the infant's weight on a scale. During the vaccination, the infant was laying on mother's  
261 lap. Soothing was performed in the way the mother preferred. We captured one cry sample at the  
262 beginning of the cry bout from every infant.

263 The duration of the samples in the whole data ranged from 16.9 s to 150 s (mean = 80.7 s;  
264  $SD = 18.8$  s). The audio recorder used was a Zoom H4n recorder with built-in condenser  
265 microphones. Recordings were stored with a 48-kHz sampling rate, two-channel audio in a 24-bit  
266 Waveform Audio file (WAV) format. The distance between the infant's mouth and the microphone  
267 was 1.3 m for infants being vaccinated and 70 cm for infants being weighed. The microphone was

268 fixed on a wall stand.

## 269 **Acoustic variables**

270 As the cry samples were captured in clinical settings containing varying amounts of  
271 extraneous sounds, the first task was to separate the cry vocalizations from these extraneous sounds  
272 which are not useful for the purpose of acoustic analysis. We used an in-house hidden Markov  
273 model (HMM) (Schuster-Böckler & Bateman, 2007) based audio segmentation system (Naithani et  
274 al., 2018) for cry segment extraction, and the acoustic analysis was performed in MATLAB  
275 (Mathworks, Natick, MA). The cry data was divided to three acoustic regions; expiratory phases,  
276 inspiratory phases, and residual, where residual included all the vocalizations that are not expiratory  
277 or inspiratory cries. We included only expiratory phases in the analysis, based on the frequent  
278 praxis in earlier studies as well as the results of our preliminary study showing that expiratory cries  
279 were detected more reliably than inspiratory cries by the analysis tool (Naithani et al., 2018).

280 In the analyses, we used the first 5 expiratory phases from the beginning of the captured cry  
281 sample. The missing values of the used variables were imputed based on other scorable phases if  
282 there was a minimum of 3 scorable phases. Only phases with duration longer than 500 ms were  
283 included, in line with previous studies (Fuamenya et al., 2015; Reggiannini et al., 2013). The  
284 identified expiratory phases were then divided into overlapping frames of 25-ms duration and 50 %  
285 overlap, and fundamental frequency (F0) was extracted for each such frame.

286 As cry variables we used fundamental frequency (F0) and the variation of fundamental  
287 frequency (F0var), which we estimated using the YIN algorithm (De Cheveigné et al., 2002). In line  
288 with earlier studies (Michelsson & Michelsson, 1999; Rothgänger, 2003), F0 was defined as the mean  
289 of first five within-sample means of frame-wise fundamental frequencies, and F0var was defined as  
290 mean of the first five within-sample standard deviations of frame-wise fundamental frequencies. Cry  
291 phases with more than 70% inharmonic frames selected via absolute threshold parameter of the YIN

292 algorithm (here 0.3), were excluded (for more information, see Fuamenya et al., 2015). Descriptive  
293 characteristics of F0 in different analyses are presented in Table 1.

294  
295 **Table 1. Descriptive data of F0 in Tampere and Cape Town cohorts.**

| Cohort                     | F0 (Hz) | F0 SD | F0var | F0var SD |
|----------------------------|---------|-------|-------|----------|
| Tampere ( <i>N</i> = 54)   | 463.45  | 62.52 | 65.18 | 26.10    |
| Cape Town ( <i>N</i> = 58) | 475.34  | 48.20 | 54.63 | 21.49    |

296

## 297 Eye tracking assessments in Tampere

298 In the 8-month follow-up visit, the infants participated in an eye tracking assessment of  
299 saccadic reaction times measured during separate oculomotor orienting and attention  
300 disengagement paradigms. During the assessment, the infant sat on the parent's lap in a dimly lit  
301 room watching the test stimuli on a 23-in monitor located at 60±5 cm distance from the infant's  
302 eyes. The parent was asked to close her/his eyes during the recording to avoid false registrations  
303 (Gredebäck et al. 2010). The session was paused or terminated in case the infant expressed  
304 inconvenience or was not willing to co-operate. Eye tracking data were collected by using a Tobii  
305 TX300 remote eye tracking camera (Tobii Technology, Stockholm, Sweden) with a 300-Hz  
306 sampling rate.

307 Before recording the data, the eye tracker was calibrated by using a 5-point calibration script  
308 and Tobii SDK calibration algorithms. We repeated the calibration two times if one or more  
309 calibration points were missing or inadequate. We used the final calibration in case none of the  
310 calibrations produced an adequate result.

311 The tasks (i.e., oculomotor orienting and attention disengagement) were both divided in two  
312 blocks that were presented in alternate order starting with the first block of the oculomotor orienting  
313 task, followed by the first disengagement block, and ending with the second oculomotor orienting  
314 and disengagement blocks. Both oculomotor orienting blocks included 16 trials and the  
315 disengagement blocks included 24 trials (i.e., a total of 32 and 48 trials in the oculomotor orienting  
316 and disengagement tasks, respectively). Cheerful music with smiling children was played between  
317 the blocks. Stimulus presentation was controlled by an open-source software written in Python  
318 programming language (<https://github.com/infant-cognition-tampere/drop>), together with Psychopy  
319 functions and a Tobii SDK plug-in. For both tasks, all data processing from the raw  $x$ - $y$  gaze  
320 position coordinates to the parameters reflecting oculomotor orienting and disengagement were  
321 completed automatically using gazeAnalysisLib, a library of MATLAB routines for offline analysis  
322 of raw gaze data (Leppänen et al., 2015).

323 **Oculomotor orienting.** Each trial in the oculomotor orienting task started with a 1000-ms  
324 blank screen followed by an attention-grabbing animation presented on the center of the screen. The  
325 animation was a checkerboard pattern and it rotated into its mirror image after each 250 ms. The  
326 pattern remained visible at least 250 ms until the infant looked at it. When the infant looked at the  
327 central cue, the cue disappeared and the target (a checkerboard pattern) appeared randomly in one  
328 of the four corners of the monitor. The target remained visible 750 ms after the infant's point of  
329 gaze was first recorded in the target area. After that, a picture of a cartoon image or a toy combined  
330 by a joyful audio stimulus was presented on the center of the screen as a rewarding stimulus. The  
331 eye tracking data was analyzed with the gazeAnalysisLib (Leppänen et al., 2015) to determine the  
332 latency of infants' orienting response (saccadic reaction time) from the central to the target  
333 stimulus. Gaze shifts away from the screen and reaction times longer than 1000 ms were excluded.

334 Infants with 4 or more scorable oculomotor orienting trials were included. The criteria for  
335 included trials were: adequate fixation on the central stimulus (i.e., >70 % of the time) during the

336 time preceding a gaze shift, sufficient amount of non-missing data samples (i.e., no gaps longer than  
337 200 ms), and valid information about the time of the gaze transition from the central to the  
338 peripheral stimulus (i.e., the transition did not occur during a period of missing data). Trials with  
339 gaze shifts within a period that started 150 ms after the onset of the peripheral stimulus and ended  
340 1000 ms after the lateral stimulus onset were used to calculate mean oculomotor orienting latency  
341 for each participant (Leppänen et al. 2015).

342       **Attention disengagement.** Attention disengagement was measured with a gaze-contingent  
343 Overlap paradigm, which has been commonly used for measuring infant attention disengagement  
344 from various stimuli (e.g., Peltola et al., 2008; 2018). First, a fixation point was presented on the  
345 center of the screen until the infant looked at it for 500 ms. After that, a happy or a fearful face, or a  
346 non-face stimulus (a phase-scrambled rectangle containing the amplitude and color spectra of the  
347 original face stimuli) appeared on the center of the screen for 1000 ms. A distractor stimulus (a  
348 vertical checkerboard pattern) was then presented on the left or right side of the screen parallel to  
349 the central stimulus for 500 ms. At 250 ms the distractor stimulus changed to its mirror image. After  
350 500 ms, the distractor stimulus disappeared and the central stimulus remained on the screen for  
351 1000 ms, followed by a 1000-ms blank screen before the next trial. The central stimulus conditions  
352 (happy or fearful face, or the non-face stimulus) were presented in random order with the restriction  
353 that the same stimulus condition was not repeated more than 3 times in a row.

354       The corneal-reflection eye tracker measured the reaction times for gaze shifts between the  
355 central stimulus and the distractor stimulus. A *dwelling time index* reflecting attention disengagement  
356 was calculated if there were at least 3 scorable trials in each stimulus condition. We calculated the  
357 dwelling time index using the trials with a gaze shift and trials without a gaze shift, excluding non-  
358 scorable trials, and the time interval from the shortest to the longest acceptable saccadic reaction  
359 time. Trials with insufficient fixation on the central stimulus (i.e., >70 % of the time) during the  
360 time preceding a gaze shift or the end of the analysis period, > 200 ms gaps of valid gaze data, or

361 invalid information about the gaze shift (i.e., with the eye movement occurring during a period of  
362 missing gaze data) were excluded from the analyses. For the included trials, attention dwell time  
363 on the central stimulus was determined for the period starting 150 ms from the onset of the  
364 distractor stimulus and ending 1000 ms after distractor onset. The duration was then converted to  
365 a normalized dwell time index score by using the following formula:

$$366 \quad \text{Dwell time index} = \frac{\sum_{i=1}^n \left(1 - \frac{1000 - x_i}{850}\right)}{n},$$

367 where  $x$  is the time point of the saccadic eye movement (i.e., last gaze point in the area of the  
368 central stimulus preceding a saccade toward the distractor stimulus) and  $n$  is the number of  
369 scorable trials in a given stimulus condition. In this index, the shortest acceptable saccadic  
370 reaction time (150 ms) results in 0, and the longest possible saccadic reaction time (or lack of  
371 saccade, which is equal to the last measured time point of the central stimulus at 1000 ms) results  
372 in a score of 1 (Leppänen et al., 2015). The dwell time index was calculated as the mean of the  
373 stimulus conditions (happy or fearful face, or the non-face stimulus) from the accepted trials, and  
374 used as the dependent variable in the analyses of attention disengagement. The inclusion criterion  
375 was a minimum of 3 acceptable trials in each stimulus condition.

## 376 **Eye tracking assessments in Cape Town**

377 Similar to the assessments in Tampere, infants were assessed in a dimly lit room at a private  
378 health clinic or a state hospital. A custom MATLAB script (Mathworks, Natick, MA), running on  
379 OS X (Apple Inc., CA), and interfacing via Psychtoolbox and Tobii SDK plug-in with the eye  
380 tracking system was used for stimulus presentation and data collection (see Pyykkö et al., 2019 for  
381 full description of the tests). Eye tracking data were collected by using a Tobii X2-60 or TX60  
382 screen-based eye tracking system (Tobii Technology, Stockholm, Sweden). The procedure for eye  
383 tracker calibration was similar for that used in the study in Tampere.



384           **Oculomotor orienting** was measured with a visual search task (adapted from Kaldy et  
385 al., 2011 and described in detail in Pyykkö et al., 2019). In this task, an image of a red apple (5°  
386 visual angle) was presented on the center of the screen, accompanied by an *oh* sound. After the  
387 infant had looked at the stimulus and 2000 ms had elapsed (or a maximum wait period of 4000 ms  
388 had elapsed), the infant saw a blank screen for 500 ms, followed by the re-appearance of the apple  
389 in a randomly chosen location. The apple was presented alone (*one-object condition*), among four  
390 or eight identical distractors (*multiple-objects condition*), or among four to eight different types of  
391 distractors (*conjunction condition*). There was a total of eight trials per condition. To obtain a  
392 similar measure for oculomotor orienting as in the Tampere cohort, we extracted orienting latencies  
393 from the data collected in the one-object condition, and averaged these latencies for each child to  
394 obtain a measure of oculomotor orienting.

395           In the **disengagement task**, infants saw two stimuli with a 1000 ms onset asynchrony. The  
396 first was a picture of a non-face pattern (as above) or a face of a South African female expressing  
397 happiness or fear. The ethnicity of the model matched that of the child. The second stimulus was a  
398 geometric shape (black and white circles or a checkerboard pattern) laterally on the left or right side  
399 of the screen, which was superimposed by a still picture of the first frame of a child-friendly  
400 cartoon animation. When the infant shifted gaze to the lateral image or 2000 ms had elapsed, the  
401 still picture turned into a dynamic cartoon for 4000 ms. Infants saw a total of 16 trials with non-  
402 faces and 16 with faces. As above, the dwell time indices were calculated separately for each of the  
403 stimulus conditions by using an automated script.

## 404 **Statistical Analyses**

405           We performed the statistical analyses with SPSS version 25.0 (IBM Corp., Armonk, NY).  
406 The alpha level for statistical significance was set at .05. All the variables were normally distributed  
407 according to Kolmogorov-Smirnov tests. We studied the associations between infant cry and later

408 visual attention with Pearson's two-tailed correlation coefficients. In the Tampere cohort, we  
409 conducted additional analyses to control for the location of the cry sample in the cry bout by  
410 including only those infants whose cry sequence was from the beginning of a bout. In the Cape  
411 Town cohort, we conducted an additional analysis to control for the possible influence of prenatal  
412 SSRI medication by including only those infants without prenatal SSRI exposure. In the Tampere  
413 cohort there were no infants with SSRI exposure and in the Cape Town cohort all the cry samples  
414 were from the beginning of a cry bout.

## 415 **Results**

416  
417 As can be observed from Table 2, the analysis within the Tampere cohort showed a marginal  
418 positive correlation between F0 and attention disengagement. When F0 was higher, the dwell time  
419 index was larger, i.e., the infants were slower to shift gaze away from the central stimulus to the  
420 distractor stimulus. A similar but a larger correlation was observed in the additional analysis  
421 including only those infants whose cry sequence was captured from the beginning of a bout. A  
422 similar correlation between F0 and attention disengagement was, however, not found in the Cape  
423 Town cohort, neither in the primary analyses nor in the analysis where infants with exposure to  
424 prenatal SSRI medication were excluded.

425       There were no statistically significant correlations between F0 and oculomotor orienting in  
426 either cohort. Further on, there were no statistically significant correlations between F0 variability  
427 and either of the attentional outcome variables. The correlations are presented in Table 2.

428

429 **Table 2. Correlations (Pearson's *r*) between the F0 parameters and attention outcomes in the**  
 430 **two cohorts.**

|                                           |       | Oculomotor orienting  | Attention disengagement |
|-------------------------------------------|-------|-----------------------|-------------------------|
| <b>Tampere</b>                            | F0    | $r = .047, p = .741$  | $r = .288, p = .052$    |
|                                           | F0var | $r = -.102, p = .471$ | $r = -.048, p = .750$   |
| <b>Tampere, beginning of the cry bout</b> | F0    | $r = .249, p = .194$  | $r = .497, p = .008$    |
|                                           | F0var | $r = .115, p = .553$  | $r = -.041, p = .840$   |
| <b>Cape Town</b>                          | F0    | $r = -.053, p = .726$ | $r = .160, p = .252$    |
|                                           | F0var | $r = -.141, p = .343$ | $r = .038, p = .785$    |
| <b>Cape Town, prenatal SSRI excluded</b>  | F0    | $r = -.077, p = .652$ | $r = .141, p = .373$    |
|                                           | F0var | $r = -.073, p = .668$ | $r = -.075, p = .636$   |

431

## 432 **Discussion**

433

434 The present study is the first to explore the relation of infant cry acoustics to visual attention during  
 435 the first year. It integrates two previously separate research lines of infant cry analysis and eye  
 436 tracking based measurement of infant visual attention. Saccadic reaction times during infancy have  
 437 been suggested to be a basic cognitive skill which mediates the development of more advanced  
 438 cognitive functions (Dougherty & Haith, 1997). Using these methods, we studied whether higher  
 439 and more unstable fundamental frequency (F0) of neonatal cry would be connected to visual  
 440 attention measured with eye tracking in later infancy.

441 For the most part, the results did not indicate that the F0 of neonatal cry is associated with  
442 visual attention at 6 to 8 months of age. The only exception was an association between higher  
443 neonatal F0 and slower attention disengagement from central stimuli to peripheral distractor stimuli  
444 at 8 months of age in the Tampere cohort. This result was replicated when we controlled for the  
445 location of the analyzed cry sample within the cry bout, with a larger correlation observed when the  
446 cry was captured from the beginning of the cry bout. The same association was not, however,  
447 observed in the Cape Town cohort where the cry was captured at 6 weeks and attention  
448 disengagement at 6 months. Furthermore, oculomotor orienting turned out to have no correlation  
449 with F0 in either sample. Finally, the variation of F0 did not correlate with the eye tracking  
450 outcomes in any of the analyses.

451 The lack of correlation between neonate cry and oculomotor orienting in the current cohorts  
452 could be due to the early maturation of oculomotor orienting, which could result in rather low  
453 variability in saccadic reaction times in infants from typically developed cohorts at 6 and 8 months.  
454 Indeed, the variability in oculomotor orienting times were moderately low in the current cohorts,  
455 and the variability of saccadic reaction times in the attention disengagement task was higher than  
456 variability in the oculomotor orienting task. Both F0 and oculomotor orienting have been indicated  
457 to reflect later cognitive functions, and the brainstem and vagal nerve to have important roles in  
458 their regulation. A distinctive difference between the two attention measurements, i.e., oculomotor  
459 orienting and disengagement, is that in the disengagement task, attention needs to be disengaged  
460 from a stimulus at fixation, whereas in the oculomotor orienting task, shifts of attention indicate a  
461 reaction to a new stimulus appearing on a blank screen. This difference may render the  
462 disengagement task cognitively more demanding. Matsuzawa and Shimojo (1997) observed  
463 significant differences in the maturation of these two components of attention. Disengagement  
464 times decreased markedly from 2 ½ months to 6 months of age, and changed only little from 6  
465 months up to 1 year. In contrast, oculomotor orienting seemed to have matured before the first

466 measurement at 2 ½ months and showed only minor changes within the studied age period.  
467 Additionally, saccadic reaction times in the disengagement task at 2 ½ months were approximately  
468 twice as long compared to saccadic reaction times in the oculomotor orienting task, and approached  
469 the speed of oculomotor orienting at 6 months. Thus, differences in the maturational timing of the  
470 two components of attention may have influenced our results, considering that the eye tracking  
471 registrations were captured at 6 or 8 months. Future studies may benefit from measuring  
472 oculomotor orienting at an earlier age.

473           Nevertheless, the difference between the maturation of oculomotor orienting and  
474 disengagement does not explain why there was a correlation between F0 and attention  
475 disengagement only in the Tampere cohort but not in the Cape Town cohort. Considering the lack  
476 of correlation between F0 and attention disengagement in the Cape Town cohort we will first pay  
477 attention to the age differences at the time of cry recording between the cohorts. Secondly, we  
478 discuss the potential influence of early caregiver-infant interaction on the observed pattern of  
479 results.

480           There is a consensus that early cry reflects the development of the central nervous system  
481 (LaGasse et al., 2005; Lester, 1987). The regulation of cry goes through prominent changes within  
482 the first months of life. Neonatal cry is reflex-like, regulated by the brainstem and not dependent on  
483 higher cortical areas, the influence of which increase with age (Newman, 2007). Due to the intense  
484 early development of cry regulation, it is thus possible that the variation in cry acoustics at 6 weeks  
485 of age does not reflect activity of areas important for visual attention (e.g., brainstem and vagal  
486 nerve) to the same extent as cry captured at the neonatal age. Further on, it has been detected that  
487 F0 changes as a function of age in normal development. F0 decreases in the first days and weeks,  
488 which is usually attributed to the growth of vocal cords. Decrease of F0 is followed by an increase  
489 of F0, which is suggested to relate to progressive control of vocalizations due to neurological  
490 maturation. However, the exact time course of this process is not clear (Baek & de Souza, 2007;

491 Gilbert et al., 1996). Consequently, the prominent changes in the regulation of cry as well as normal  
492 age-related changes in F0 during the first weeks and months of life highlight the importance for  
493 standardizing the age of recording data for cry analysis. For future studies, we suggest recording cry  
494 samples at the neonatal period, as this will also make the data comparable to the earlier studies  
495 showing associations between neonatal F0 and later cognitive development (Huntington et al.,  
496 1990).

497 Likewise, interaction with the social and physical environment has the potential to influence  
498 infants' cognitive development and cry acoustics. Studies with neonates have shown that the  
499 amount and the acoustic qualities of cry may vary as a function of caregiver-infant interaction  
500 (Belsky et al., 1984; Lotem & Winkler, 2004), with tactile stimulation and reinforcement learning  
501 playing a significant role in the variation of early cry (Cecchini et al., 2007). Consequently, infants  
502 learn to adjust their cry to the most effective level according to situational factors. In the current  
503 study, the age difference between the cry recordings in Tampere (0-5 days) and Cape Town (6  
504 weeks) may be considered a significant timespan in postnatal development. Additionally, a  
505 proportion of Cape Town mothers had psychiatric problems such as depression and anxiety  
506 disorders, which are known to influence to mother-child interaction and the development of the  
507 child (Field, 2010), and may have further influenced the results. Thus, in future studies, in addition  
508 to standardizing the age of cry recordings, measures of early interaction quality are likely important.

509 The other cry feature that has been associated with later development in previous studies,  
510 i.e., variation of fundamental frequency (F0var), was not related to the eye tracking outcomes. A  
511 vast amount of studies has observed more varying F0 among preterm and/or low birthweight  
512 infants, infants with prenatal risk factors, as well as infants with severe medical or developmental  
513 abnormalities. Instead, autism spectrum disorder has been associated with reduced variation in F0.  
514 While it is possible that the absence of associations between F0 variation and the outcomes was due  
515 to the infants in our study being full term, with normal birth weight, and without any known health

516 or developmental problems, it should be noted that two earlier studies (Huntington et al., 1990;  
517 Lester, 1987) detected that more varying F0 was related to lower scores in cognitive outcome  
518 measures at several ages even after controlling for the risk factors, including prematurity and  
519 prenatal exposure to drugs in the cohorts. As there is currently a little methodological consensus  
520 about the determination of F0var, an important line for future studies is to examine the predictive  
521 significance of different possibilities in determining F0var, such as index variables or micro-  
522 variation measures, e.g., fluctuation or interquartile range.

523         The influence of the trigger of the cry and the location of the analyzed cry sample in the cry  
524 bout need to be considered further. Our additional analysis in the Tampere cohort suggests that the  
525 correlation between F0 and attention disengagement is stronger when the cry is captured from the  
526 beginning of the cry bout. In a cry triggered by a sudden pain, the F0 is high in the beginning and  
527 decreases by time. In contrast, in an inconvenience cry (e.g., hunger, cold, or loneliness) the F0 is  
528 lower in the beginning and increases by time if the response to the cry is delayed (Green et al.,  
529 1998; Zeskind et al., 1985). In our study the trigger in the Cape Town cohort was either a  
530 vaccination or a weight measurement on a scale. In Tampere, the triggers ranged from venipuncture  
531 to unknown inconvenience. However, the venipuncture did not trigger a cry in all cases, and there  
532 were no other triggers in Tampere which could be considered as painful. In general, attempts to  
533 make a taxonomy of different cry triggers face prominent challenges, because evaluating the trigger  
534 is more or less subjective except in case of strong pain caused by an external operator. Future  
535 studies could benefit from measuring infants' arousal levels during cry paradigms (e.g., with heart  
536 rate or skin conductance measurements) as autonomic arousal is known to influence F0 (Porter et  
537 al., 1988; Shinya et al., 2014) and correlate with the experience of pain and inconvenience (Stevens  
538 et al., 2007). Thus, it would be important to study whether cry samples during increased arousal  
539 (like sudden pain, or prolonged cry) are more informative when studying the correlation between  
540 cry and later cognitive variables. The representativeness of the used cry samples is important for

541 increasing the accuracy of the used F0 variables. It is possible to use several recordings or multiple  
542 samples within a recording. However, also in this approach the influence of arousal and the location  
543 of the used sample in the whole cry sequence should be taken into consideration.

544         The reliability of the correlation estimates in the current study was limited by the number of  
545 infants included in the analyses, and it will be important to replicate the findings with a larger  
546 sample. Additionally, the tasks for measuring oculomotor orienting and attention disengagement  
547 were not completely identical in Tampere and Cape Town, which may have influenced the results.  
548 Notwithstanding these limitations, a clear strength of the study is the integration of two previously  
549 separate research lines of infant cry analysis and eye tracking based measurement of infant visual  
550 attention. Both methods enable registrations at a very early age which is a prominent advantage in  
551 evaluating early cognitive development. Methodological development (e.g., Naithani et al., 2018)  
552 has also enabled reliable segmentation and acoustic analyses of cry sounds captured in various  
553 settings, broadening the possibilities of neonatal cry analysis.

554         Monitoring early cognitive development is an important, yet challenging part of pediatric  
555 practice, which increases the need for applicable methods that can be administered at an earlier age  
556 than more elaborate psychological assessments. Research on the potential of using infant cry to  
557 predict cognitive development is still scarce and often conducted with small samples. In the present  
558 study with typically developing infants, the results suggested a small association between neonatal  
559 cry F0 and later visual attention disengagement. Whether variations in infant cry characteristics are  
560 sufficiently distinct in typically developing populations to be used as a supporting tool for  
561 monitoring cognitive skills requires further research. Nevertheless, detecting normative variation in  
562 infant cognition is vitally important especially for identifying children with milder forms of atypical  
563 cognitive development. To reach this population for appropriate support, rehabilitation and health  
564 care as early as possible would be especially important.

565



566

## References

- 567 Baeck, H. E., and de Souza, M. N. (2007). Longitudinal study of the fundamental frequency of  
568 hunger cries along the first 6 months of healthy babies. *Journal of Voice*, 21, 551-559.
- 569 Bakeman, R., and Brown, J. V. (1980). Early interaction: Consequences for social and mental  
570 development at three years. *Child Development*, 51, 437-447.
- 571 Belsky, J., Rovine, M., and Taylor, D. G. (1984). The Pennsylvania Infant and Family Development  
572 Project, III: The origins of individual differences in infant-mother attachment: Maternal and infant  
573 contributions. *Child Development*, 55, 718-728.
- 574 Cecchini, M., Lai, C, and Langher, V. (2007). Communication and crying in newborns. *Infant  
575 Behavior and Development*, 30, 655-665.
- 576 Colombo, J. (1993). *Infant cognition: Predicting later intellectual functioning*. London, UK: Sage  
577 Publications.
- 578 Colombo, J. (2001). The development of visual attention in infancy. *Annual Review of Psychology*,  
579 52, 337-367.
- 580 Colombo, J. (2002). Infant attention grows up: The emergence of a developmental cognitive  
581 neuroscience perspective. *Current Directions in Psychological Science*, 11, 196-200.
- 582 De Cheveigné, A., and Kawahara, H. (2002). YIN, a fundamental frequency estimator for speech  
583 and music. *The Journal of the Acoustical Society of America*, 111, 1917-1930.
- 584 Dougherty, T. M., and Haith, M. M. (1997). Infant expectations and reaction time as predictors of  
585 childhood speed of processing and IQ. *Developmental Psychology*, 33, 146-155.
- 586 Elsabbagh, M., Fernandes, J., Webb, S. J., Dawson, G., Charman, T., and Johnson, M. H. (2013).  
587 Disengagement of visual attention in infancy is associated with emerging autism in toddlerhood.  
588 *Biological Psychiatry*, 74, 189-194.
- 589 Esposito, G., Del Carmen Rostagno, M., Venuti, P., Haltigan, J. D., and Messinger, D. S. (2014).  
590 Atypical expression of distress during the separation phase of the strange situation procedure in  
591 infant siblings at high risk for ASD. *Journal of Autism and Developmental Disorders*, 44, 975-980.
- 592 Field, T. M. (1984). Early interactions between infants and their postpartum depressed mothers.  
593 *Infant Behavior and Development*, 7, 517-522.
- 594 Field, T. M. (2010). Postpartum depression effects on early interactions, parenting, and safety  
595 practices: A review. *Infant Behavior and Development*, 33, 1-6.
- 596 Fuamenya, N. A., Robb, M. P., and Wermke, K. (2015). Noisy but effective: Crying across the first  
597 3 months of life. *Journal of Voice*, 29, 281-286.
- 598 Gardner, J. M., Karmel, B. Z., and Flory, M. J. (2003). Arousal modulation of neonatal visual  
599 attention: Implications for development. In S. Soraci, Jr. & K. Murata-Soraci (Eds.), *Visual  
600 information processing* (p. 125–153). Westport, CT: Praeger Publishers.

- 601 Geva, R., Dital, A., Ramon, D., Yarmolovsky, J., Gidron, M., and Kuint, J. (2017). Brainstem as a  
602 developmental gateway to social attention. *Journal of Child Psychology and Psychiatry*, 58, 1351-  
603 1359.
- 604 Geva, R., and Feldman, R. (2008). A neurobiological model for the effects of early brainstem  
605 functioning on the development of behavior and emotion regulation in infants: Implications for  
606 prenatal and perinatal risk. *Journal of Child Psychology and Psychiatry*, 49, 1031-1041.
- 607 Geva, R., Schreiber, J., Segal-Caspi, L., and Markus-Shiffman, M. (2014). Neonatal brainstem  
608 dysfunction after preterm birth predicts behavioral inhibition. *Journal of Child Psychology and*  
609 *Psychiatry*, 55, 802-810.
- 610 Gilbert, H. R., and Robb, M. P. (1996). Vocal fundamental frequency characteristics of infant  
611 hunger cries: Birth to 12 months. *International Journal of Pediatric Otorhinolaryngology*, 34, 237-  
612 243.
- 613 Gredebäck, G., Johnson, S., and von Hofsten, C. (2010). Eye tracking in infancy research.  
614 *Developmental Neuropsychology*, 35, 1-19.
- 615 Green, C. R., Lebel, C., Rasmussen, C., Beaulieu, C., and Reynolds, J. N. (2013). Diffusion tensor  
616 imaging correlates of saccadic reaction time in children with fetal alcohol spectrum disorder.  
617 *Alcoholism: Clinical and Experimental Research*, 37, 1499-1507.
- 618 Green, J. A., Gustafson, G. E., and McGhie, A. C. (1998). Changes in infants' cries as a function of  
619 time in a cry bout. *Child Development*, 69, 271-279.
- 620 Hood, B. M., and Atkinson, J. (1993). Disengaging visual attention in the infant and adult. *Infant*  
621 *Behavior and Development*, 16, 405-422.
- 622 Hunnius, S., and Geuze, R. H. (2004). Gaze shifting in infancy: A longitudinal study using dynamic  
623 faces and abstract stimuli. *Infant Behavior and Development*, 27, 397-416.
- 624 Hunnius, S., Geuze, R. H., Zweekens, M. J., and Bos, A. F. (2008). Effects of preterm experience on  
625 the developing visual system: A longitudinal study of shifts of attention and gaze in early infancy.  
626 *Developmental Neuropsychology*, 33, 521-535.
- 627 Huntington, L., Hans, S. L., and Zeskind, P. S. (1990). The relations among cry characteristics,  
628 demographic variables, and developmental test scores in infants prenatally exposed to methadone.  
629 *Infant Behavior and Development*, 13, 533-538.
- 630 Kaldy, Z., Kraper, C., Carter, A. S., and Blaser, E. (2011). Toddlers with autism spectrum disorder  
631 are more successful at visual search than typically developing toddlers. *Developmental Science*, 14,  
632 980-988.
- 633 Karmel, B. Z., Gardner, J. M., and Freeland, R. L. (1996). Arousal-modulated attention at four  
634 months as a function of intrauterine cocaine exposure and central nervous system injury. *Journal of*  
635 *Pediatric Psychology*, 21, 821-832.

- 636 LaGasse, L. L., Neal, A. R., and Lester, B. M. (2005). Assessment of infant cry: Acoustic cry  
637 analysis and parental perception. *Mental Retardation and Developmental Disabilities Research*  
638 *Reviews*, 11, 83-93.
- 639 Leppänen, J. M., Forssman, L., Kaatiala, J., Yrttiaho, S., and Wass, S. (2015). Widely applicable  
640 MATLAB routines for automated analysis of saccadic reaction times. *Behavior Research Methods*,  
641 47, 538-548.
- 642 Lester, B. M. (1976). Spectrum analysis of the cry sounds of well-nourished and malnourished  
643 infants. *Child Development*, 47, 237-241.
- 644 Lester, B. M. (1987). Developmental outcome prediction from acoustic cry analysis in term and  
645 preterm infants. *Pediatrics*, 80, 529-534.
- 646 Lester, B. M., and Dreher, M. (1989). Effects of marijuana use during pregnancy on newborn cry.  
647 *Child Development*, 60, 765-771.
- 648 Lotem, A., and Winkler, D. W. (2004). Can reinforcement learning explain variation in early infant  
649 crying? *Behavioral and Brain Sciences*, 27, 468.
- 650 Matsuzawa, M., and Shimojo, S.(1997). Infants' fast saccades in the gap paradigm and  
651 development of visual attention. *Infant Behavior and Development*, 20, 449-455.
- 652 McCall, R. B. (1979). The development of intellectual functioning in infancy and the prediction of  
653 later IQ. In J. D. Osofsky (Ed.), *Handbook of infant development*. Hillsdale, N.J.: Lawrence  
654 Erlbaum.
- 655 Michelsson, K., and Michelsson, O.(1999). Phonation in the newborn, infant cry. *International*  
656 *Journal of Pediatric Otorhinolaryngology*, 49, S297-S301.
- 657 Naithani, G., Kivinummi, J., Virtanen, T., Tammela, O., Peltola, M. J., and Leppänen, J. M.(2018).  
658 Automatic segmentation of infant cry signals using hidden Markov models. *EURASIP Journal on*  
659 *Audio, Speech, and Music Processing*, 1.
- 660 Newman, J. D. (2007). Neural circuits underlying crying and cry responding in mammals.  
661 *Behavioral Brain Research*, 182, 155-165.
- 662 Peltola, M. J., Leppänen, J. M., Palokangas, T., and Hietanen, J. K. (2008). Fearful faces modulate  
663 looking duration and attention disengagement in 7-month-old infants. *Developmental Science*, 11,  
664 60-68.
- 665 Peltola, M. J., Yrttiaho, S., and Leppänen, J. M. (2018). Infants' attention bias to faces as an early  
666 marker of social development. *Developmental Science*, 21, e12687.
- 667 Porter, F. L., Porges, S. W., and Marshall, R. E. (1988). Newborn pain cries and vagal tone: Parallel  
668 changes in response to circumcision. *Child Development*, 59, 495-505.
- 669 Pyykkö, J., Forssman, L., Maleta, K., Ashorn, P., Ashorn, U., and Leppänen, J. M. (2019). Early  
670 development of visual attention in infants in rural Malawi. *Developmental Science*, 22, e12761.

- 671 Rafal, R., and Robertson, L. (1995). *The neurology of visual attention*. In M. S. Gazzaniga (Ed.),  
672 *The cognitive neurosciences* (p. 625–648). Cambridge, MA: The MIT Press.
- 673 Reggiannini, B., Sheinkopf, S. J., Silverman, H. F., Li, X., and Lester, B. M. (2013). A flexible  
674 analysis tool for the quantitative acoustic assessment of infant cry. *Journal of Speech, Language,  
675 and Hearing Research*, *56*, 1416-1428.
- 676 Rose, S. A., Feldman, J. F., and Jankowski, J. J. (2003). The building blocks of cognition. *Journal  
677 of Pediatrics*, *143*, 54-61.
- 678 Rose, S. A., Feldman, J. F., and Jankowski, J. J. (2012). Implications of infant cognition for  
679 executive functions at age 11. *Psychological Science*, *23*, 1345-1355.
- 680 Rothgänger, H. (2003). Analysis of the sounds of the child in the first year of age and a comparison  
681 to the language. *Early Human Development*, *75*, 55–69.
- 682 Schuster-Böckler, B., and Bateman, A. (2007). An introduction to hidden Markov models. *Current  
683 Protocols in Bioinformatics*, *18*, A.3A.1-A.3A.9.
- 684 Sheinkopf, S. J., Iverson, J. M., Rinaldi, M. L., and Lester, B. M. (2012). Atypical cry acoustics in  
685 6-month-old infants at risk for autism spectrum disorder. *Autism Research*, *5*, 331-339.
- 686 Shinya, Y., Kawai, M., Niwa, F., and Myowa-Yamakoshi, M. (2014). Preterm birth is associated  
687 with an increased fundamental frequency of spontaneous crying in human infants at term-equivalent  
688 age. *Biology Letters*, *10*, 20140350.
- 689 Stevens, B., McGrath, P., Gibbins, S., Beyene, J., Breau, L., Camfield, C., et al. (2007).  
690 Determining behavioural and physiological responses to pain in infants at risk for neurological  
691 impairment. *Pain*, *127*, 94-102.
- 692 Vohr, B. R., Barry, L., Rapisardi, G., O'Dea, C., Brown, L., Peucker, M., et al. (1989). Abnormal  
693 brain-stem function (brain-stem auditory evoked response) correlates with acoustic cry features in  
694 term infants with hyperbilirubinemia. *Journal of Pediatrics*, *115*, 303-308.
- 695 Zeskind, P. S., Sale, J., Maio, M. L., Huntington, L., and Weiseman, J. R. (1985). Adult perceptions  
696 of pain and hunger cries: A synchrony of arousal. *Child Development*, *56*, 549-554.
- 697
